# Supplementary material
Source: Research Square preprint supplement (doi:10.21203/rs.3.rs-8751886/v1)
Supplement: Supplementary file 1 [file 3b0e2173c598e3955a61a873.docx]

**Identification of small-molecule inhibitors targeting the PD-1/PD-L1 interaction in colorectal cancer: insights from docking and molecular dynamics simulations**

**Supplementary Information**

**Table S1:** Predicted ADMET Properties for Selected PD-L1 Inhibitors.

| **Compound ID** | **INCB086550**  **CONTROL** | **CMNPD16477** | **CMNPD21979** | **CMNPD3605** |
| --- | --- | --- | --- | --- |
| **Mol Wt (Da)** | **694.816** | **709.695** | **592.605** | **663.737** |
| **Caco2 permeability: Numeric (log Papp in 10-6 cm/s)** | **-0.118** | **-0.316** | **0.14** | **-0.118** |
| **BBB permeability**  **Numeric (log BB)** | **-1.098** | **-1.815** | **-2.044** | **-1.098** |
| **CYP2D6 substrate** | **No** | **No** | **No** | **No** |
| **AMES toxicity** | **No** | **No** | **No** | **No** |
| **Hepatotoxicity** | **No** | **No** | **No** | **No** |
| **Skin Sensitisation** | **No** | **No** | **No** | **No** |

In silico ADMET profiles of the control inhibitor (INCB086550) and three leading CMNPD-derived ligands. Parameters include molecular weight (Mol wt), Caco-2 permeability (log Papp in 10^-6 cm/s), predicted blood–brain barrier (BBB) permeability (log BB), CYP2D6 substrate status, AMES test for mutagenicity, hepatotoxicity, and skin sensitization. All compounds exhibit favorable drug-likeness with no predicted CYP2D6 liability, mutagenicity, hepatotoxicity, or skin sensitization risk.

### **Table S2**: Average metrics calculated using the 200 ns of production run trajectories, with standard deviations in parentheses.

| **Metric** | **Control** | **CMNPD16477** | **CMNPD21979** | **CMNPD3605** |
| --- | --- | --- | --- | --- |
| **Protein RMSD (Å)** | 1.31  (0.15) | 1.13  (0.13) | 1.28  (0.18) | 1.19  (0.21) |
| **Ligand RMSD (Å)** | 3.09  (0.22) | 2.57  (0.17) | 3.50  (1.05) | 3.37  (1.19) |
| **Binding Pocket RMSD (Å)** | 0.73  (0.11) | 0.61  (0.11) | 0.90  (0.09) | 0.45  (0.08) |
| **Ligand-Pocket Distance (Å)** | 6.34  (0.67) | 10.82  (0.73) | 8.75  (0.67) | 8.30  (1.06) |
| **Ligand-Protein Distance (Å)** | 15.29  (0.90) | 17.86  (0.58) | 13.39 (0.37) | 15.87  (1.20) |
| **Radius of Gyration (Å)** | 13.62  (0.08) | 13.63  (0.07) | 13.69  (0.09) | 13.67  (0.08) |
| **Solvent-Accessible Surface Area (nm2)** | 58.24  (1.96) | 57.44  (1.58) | 57.27  (1.89) | 57.03  (1.94) |

**Table S3:** Analysis of hydrogen bond formation through the molecular dynamics simulations. Only hydrogen bonds with an occupancy greater than 10% are shown.

| **Compound ID** | **Acceptor** | **Donor** | **Dist.** | **Angle** | **Occupancy (%)** |
| --- | --- | --- | --- | --- | --- |
|  |  | | | | |
| **INCB086550**  **CONTROL** | Lig@N4 | Arg125@NH1 | 2.90 | 154.41 | 20.07 |
|  | DAsp61@OD1 | Lig@N5 | 2.78 | 157.68 | 39.61 |
|  | Asp26@OD2 | Lig@N1 | 2.74 | 157.64 | 35.20 |
|  | Asp26@OD1 | Lig@N1 | 2.74 | 158.14 | 34.21 |
|  | Asp61@OD2 | Lig@N5 | 2.78 | 157.12 | 34.03 |
|  | Asp61@OD2 | Lig@O3 | 2.69 | 164.68 | 31.96 |
|  | Asp61@OD1 | Lig@O3 | 2.68 | 164.18 | 21.47 |
|  |  | | | | |
| **CMNPD16477** | Lig@O14 | Ser117@OG | 2.79 | 162.48 | 19.45 |
|  | Gln66@OE1 | Lig@O6 | 2.73 | 161.45 | 16.45 |
|  |  | | | | |
| **CMNPD21979** | - | - | - | - | - |
|  |  | | | | |
| **CMNPD3605** | Lig@O13 | Arg113@NH2 | 2.80 | 159.95 | 50.87 |
|  | Lig@O13 | Arg125@NH2 | 2.81 | 160.22 | 49.35 |
|  | Lig@O12 | Arg125@NE | 2.84 | 160.24 | 47.33 |
|  | Lig@O3 | Tyr123@OH | 2.82 | 157.44 | 38.46 |
|  | Lig@O12 | Arg113@NE | 2.84 | 160.89 | 34.49 |
|  | Lig@O12 | Arg125@NH2 | 2.82 | 154.87 | 25.45 |
|  | Lig@O12 | Arg113@NH2 | 2.82 | 154.73 | 20.74 |
|  | Lig@O13 | Arg113@NE | 2.84 | 154.40 | 13.16 |
|  | Lig@O13 | Arg125@NE | 2.86 | 157.50 | 12.26 |
|  | Glu58@OE2 | Lig@O9 | 2.70 | 159.37 | 11.63 |
|  | Glu58@OE1 | Lig@O8 | 2.71 | 160.99 | 10.63 |

**Table S4:** Residue-wise binding free energy (kcal/mol) decomposition of the crucial contributing residues.

| **Compound ID** | **Residue** | **EvdW**  **(kcal/mol)** | **Eelec**  **(kcal/mol)** | **Gpol**  **(kcal/mol)** | **Gnp**  **(kcal/mol)** | **Gtotal**  **(kcal/mol)** |
| --- | --- | --- | --- | --- | --- | --- |
| **INCB086550**  **CONTROL** | Lig | -16.58 | -68.75 | 62.68 | 0 | -22.65 |
|  | Asp26 | -2.14 | -29.99 | 30.52 | 0 | -1.61 |
|  | Asp61 | -1.08 | -47.28 | 47.33 | 0 | -1.03 |
|  | Lys124 | -1.44 | 14.87 | -11.86 | 0 | 1.56 |
| **CMNPD16477** | Lig | -14.25 | -9.72 | 16.49 | 0 | -7.48 |
|  | Tyr56 | -1.99 | -0.57 | 1.02 | 0 | -1.54 |
|  | Ala121 | -1.60 | 0.66 | -0.44 | 0 | -1.38 |
|  | Met115 | -1.57 | -0.56 | 0.98 | 0 | -1.15 |
|  | Ile54 | -1.06 | 0.003 | -0.06 | 0 | -1.11 |
|  | Gly120 | -1.76 | -1.49 | 2.21 | 0 | -1.03 |
|  | Gly119 | -1.61 | -2.07 | 2.76 | 0 | -0.92 |
| **CMNPD21979** | Lig | -20.74 | 3.56 | 9.08 | 0 | -8.10 |
|  | Tyr56 | -3.91 | -0.71 | 1.55 | 0 | -3.07 |
|  | Met115 | -4.14 | -0.77 | 2.08 | 0 | -2.83 |
|  | Arg113 | -1.18 | -2.63 | 1.38 | 0 | -2.43 |
|  | Tyr123 | -2.25 | -0.15 | 1.26 | 0 | -1.14 |
|  | Asp61 | -0.33 | 2.66 | -0.88 | 0 | 1.45 |
|  | Glu58 | -1.02 | 5.68 | 6.55 | 0 | 11.21 |
| **CMNPD3605** | Lig | -13.06 | -55.94 | 53.36 | 0 | -15.63 |
|  | Arg113 | -1.82 | -48.32 | 41.65 | 0 | -8.49 |
|  | Arg125 | -0.19 | -49.57 | 41.85 | 0 | -7.89 |
|  | Tyr123 | -5.39 | -2.81 | 6.22 | 0 | -1.98 |
|  | Met115 | -1.24 | -0.32 | 0.60 | 0 | -0.96 |
|  | Asp122 | -0.32 | 14.26 | -12.98 | 0 | 0.97 |
|  | Glu58 | -0.96 | 19.57 | -15.96 | 0 | 2.65 |
